# Supplementary material for: Biotransformed Metabolites of the Hop Prenylflavanone Isoxanthohumol
Source: PubMed Central journal article supplement (PMC6385124; doi:10.3390/molecules24030394), 2019-01-22

**Isoxanthohumol (1):** white amorphous powder,  $[\alpha]_D +0.0^\circ$  ( $c$  0.2, MeOH); UV  $\lambda_{\max}$  (MeOH) ( $\log \epsilon$ ) 286 (4.34), 397 (3.56); IR (KBr)  $\nu_{\max}$ : 3393, 1597, 1519, 1450, 1415, 1349, 1274, 1148, 1092, 834  $\text{cm}^{-1}$ ;  $^1\text{H}$  NMR ( $\text{CD}_3\text{OD}$ , 500 MHz)  $\delta$  7.30 (2H, d,  $J = 8.5$  Hz, H-2', 6'), 6.82 (2H, d,  $J = 8.5$  Hz, H-3', 5'), 6.12 (1H, s, 1H), 5.26 (1H, dd,  $J = 12.8, 2.8$  Hz, H-2), 5.13 (1H, brt,  $J = 7.2$  Hz, H-2''), 3.79 (3H, s, 5-OCH<sub>3</sub>), 3.20 (2H, m, H-1''), 2.96 (1H, dd,  $J = 16.8, 13.0$  Hz, H-3a), 2.66 (1H, dd,  $J = 16.8, 3.0$  Hz, H-3b), 1.61 (3H, s, H-5''), 1.55 (3H, s, H-4'');  $^{13}\text{C}$  NMR ( $\text{CD}_3\text{OD}$ , 125 MHz)  $\delta$  193.2 (C-4), 164.5 (C-8a) 164.0 (C-7), 162.0 (C-5), 158.9 (C-4'), 131.9 (C-3''), 131.7 (C-1'), 129.0 (C-2',6'), 124.0 (C-2''), 116.0 (C-3',5'), 110.1 (C-8), 105.9 (C-4a), 93.6 (C-6), 80.1 (C-2), 56.1 (5-OCH<sub>3</sub>), 46.3 (C-3), 26.1 (C-5''), 22.8 (C-1''), 18.1 (C-4''); EIMS 70eV  $m/z$  354 [M]<sup>+</sup>, 339, 311, 299, 234, 219, 191, 179, 120 (calcd. for C<sub>21</sub>H<sub>22</sub>O<sub>5</sub>).

**Figure S1.**  $^1\text{H}$  NMR spectrum of **1**

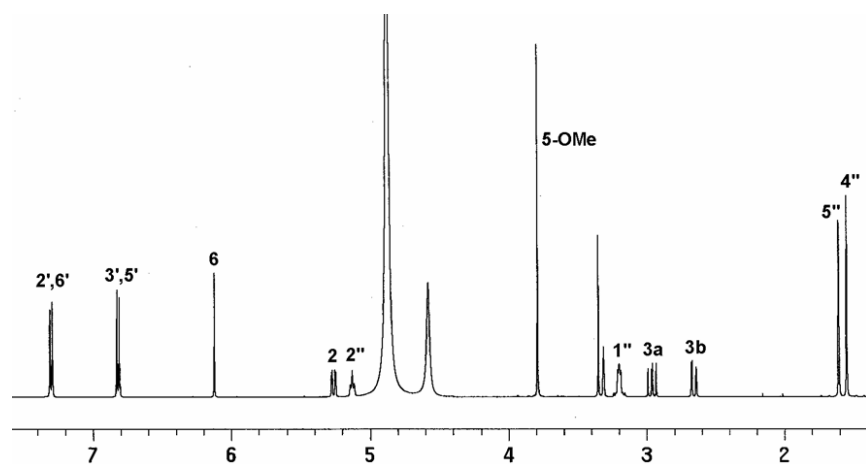

**Figure S2.**  $^{13}\text{C}$  NMR spectrum of **1**

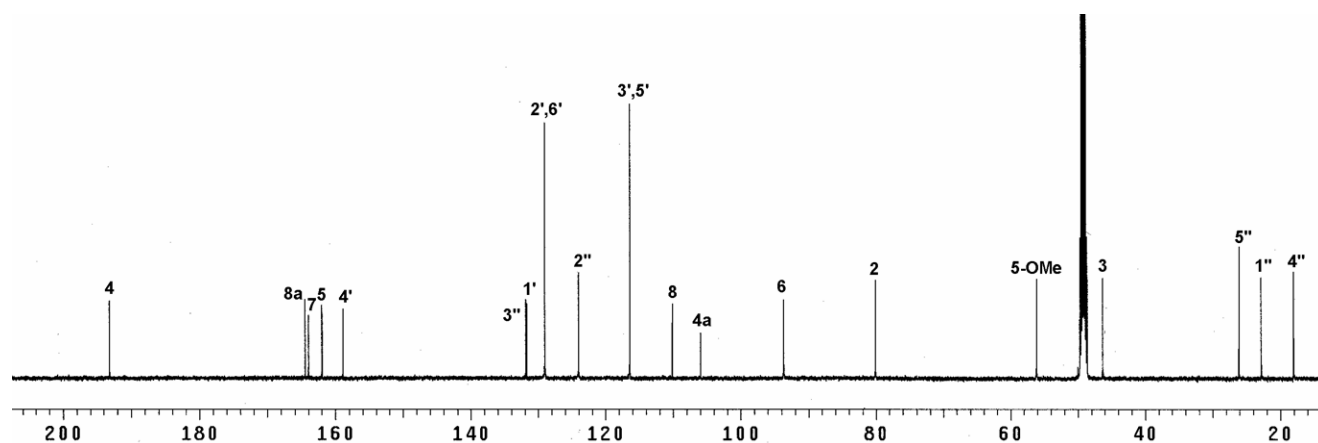

**Scheme S1.** HPLC profiles of oxygenated metabolites (**2-7**) of isoxanthohumol (**1**)

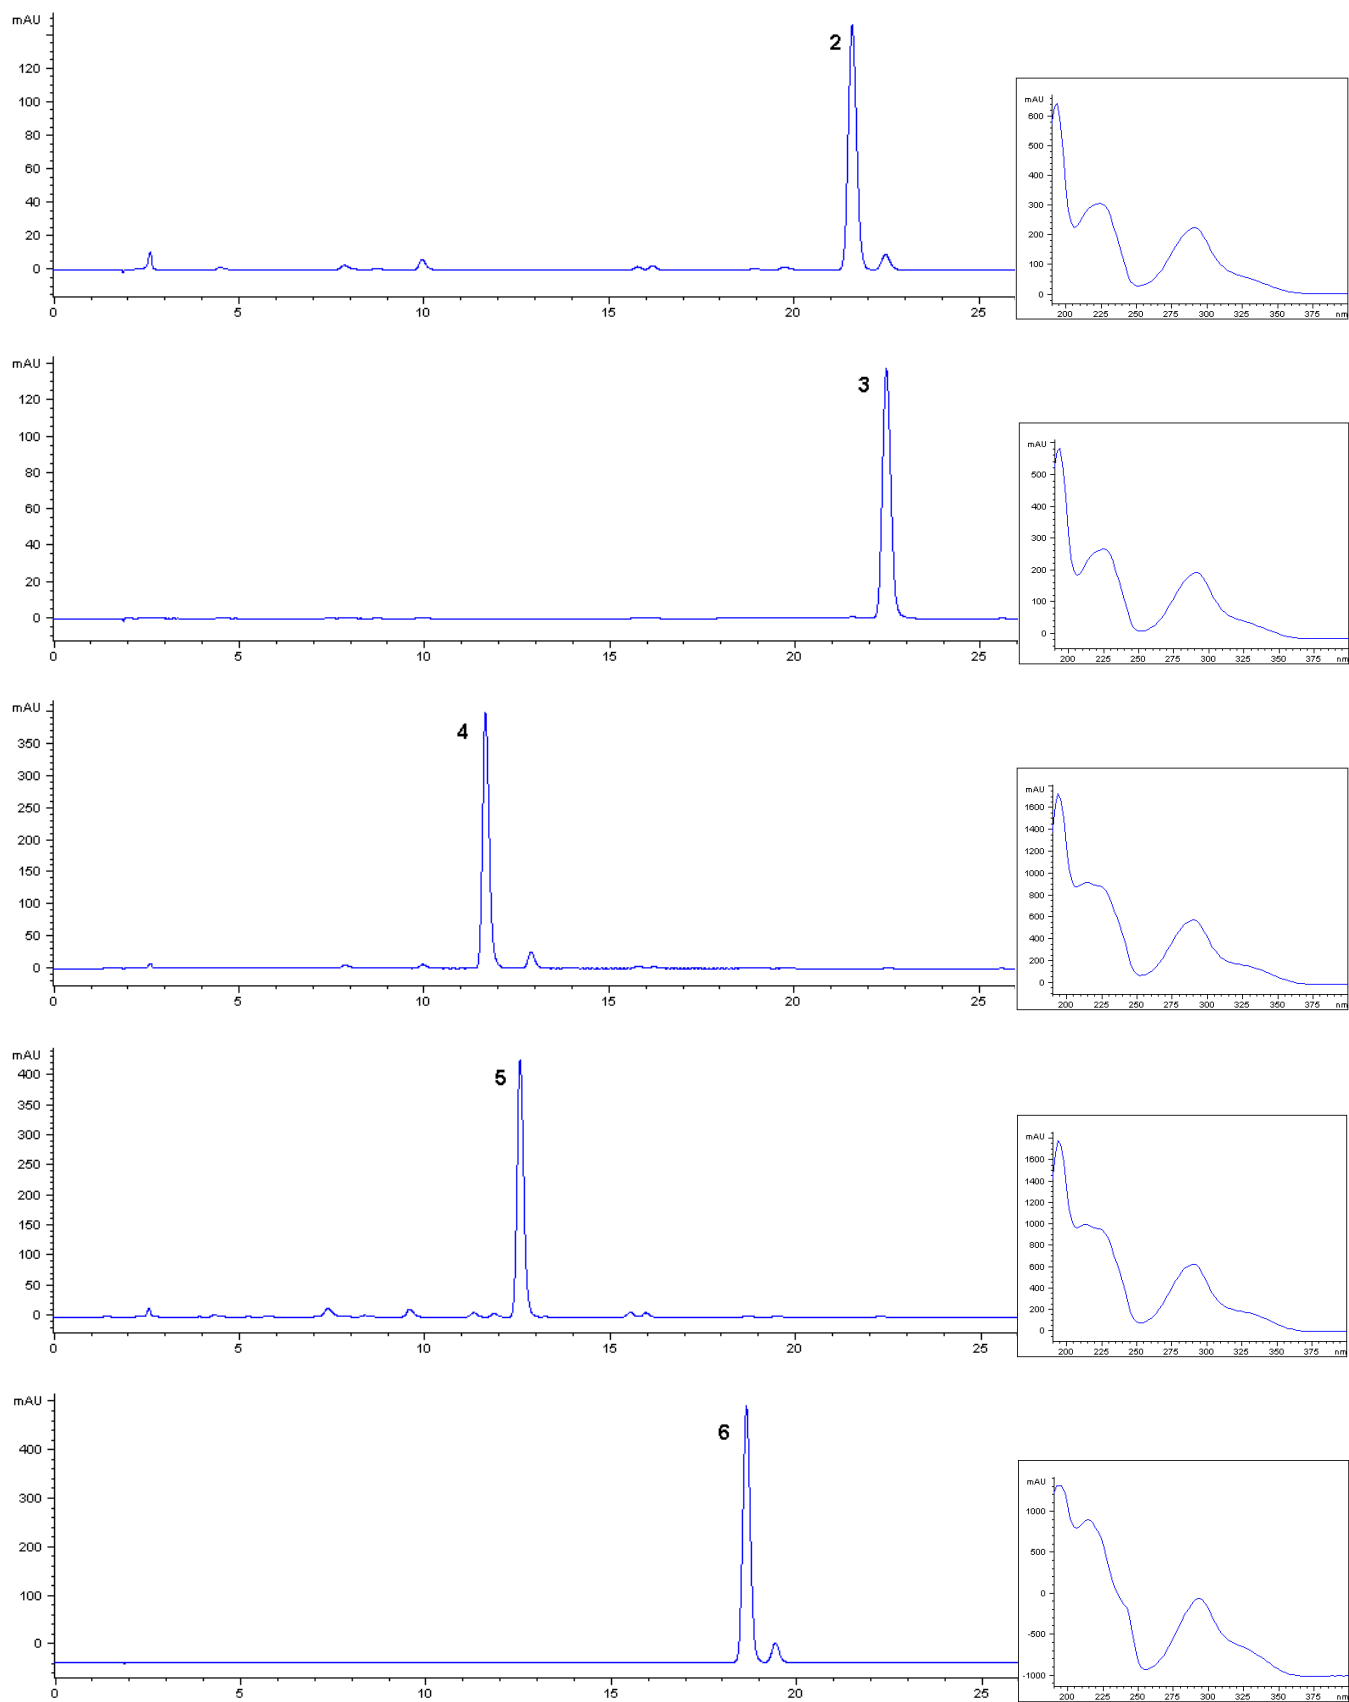

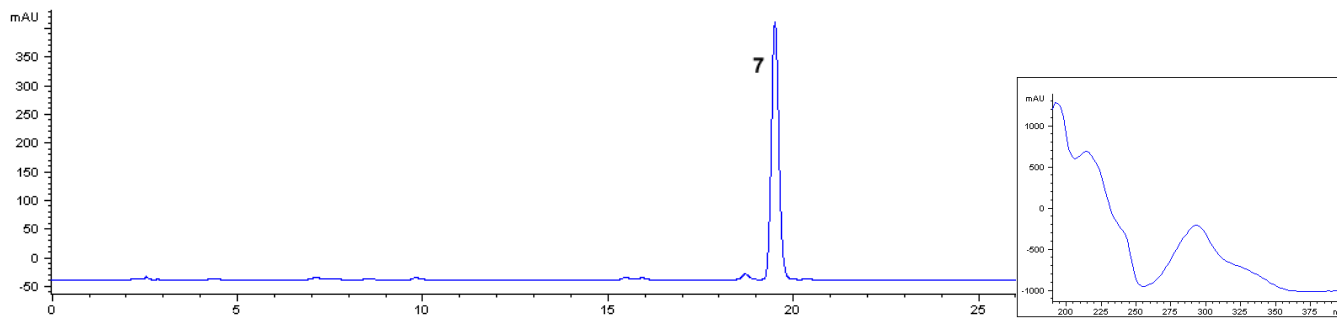

HPLC was performed on a Hewlett Packard 1100 series composed of a degasser, a binary mixing pump, a column oven and a DAD detector using Waters SunFire™ (4.6 × 150 mm, 5 μm) with acetonitrile (solvent A) and water containing 0.1% formic acid (solvent B) at 1 mL/min under the wavelength 280 nm.

Figure S3. <sup>1</sup>H NMR spectrum of the new compound 2

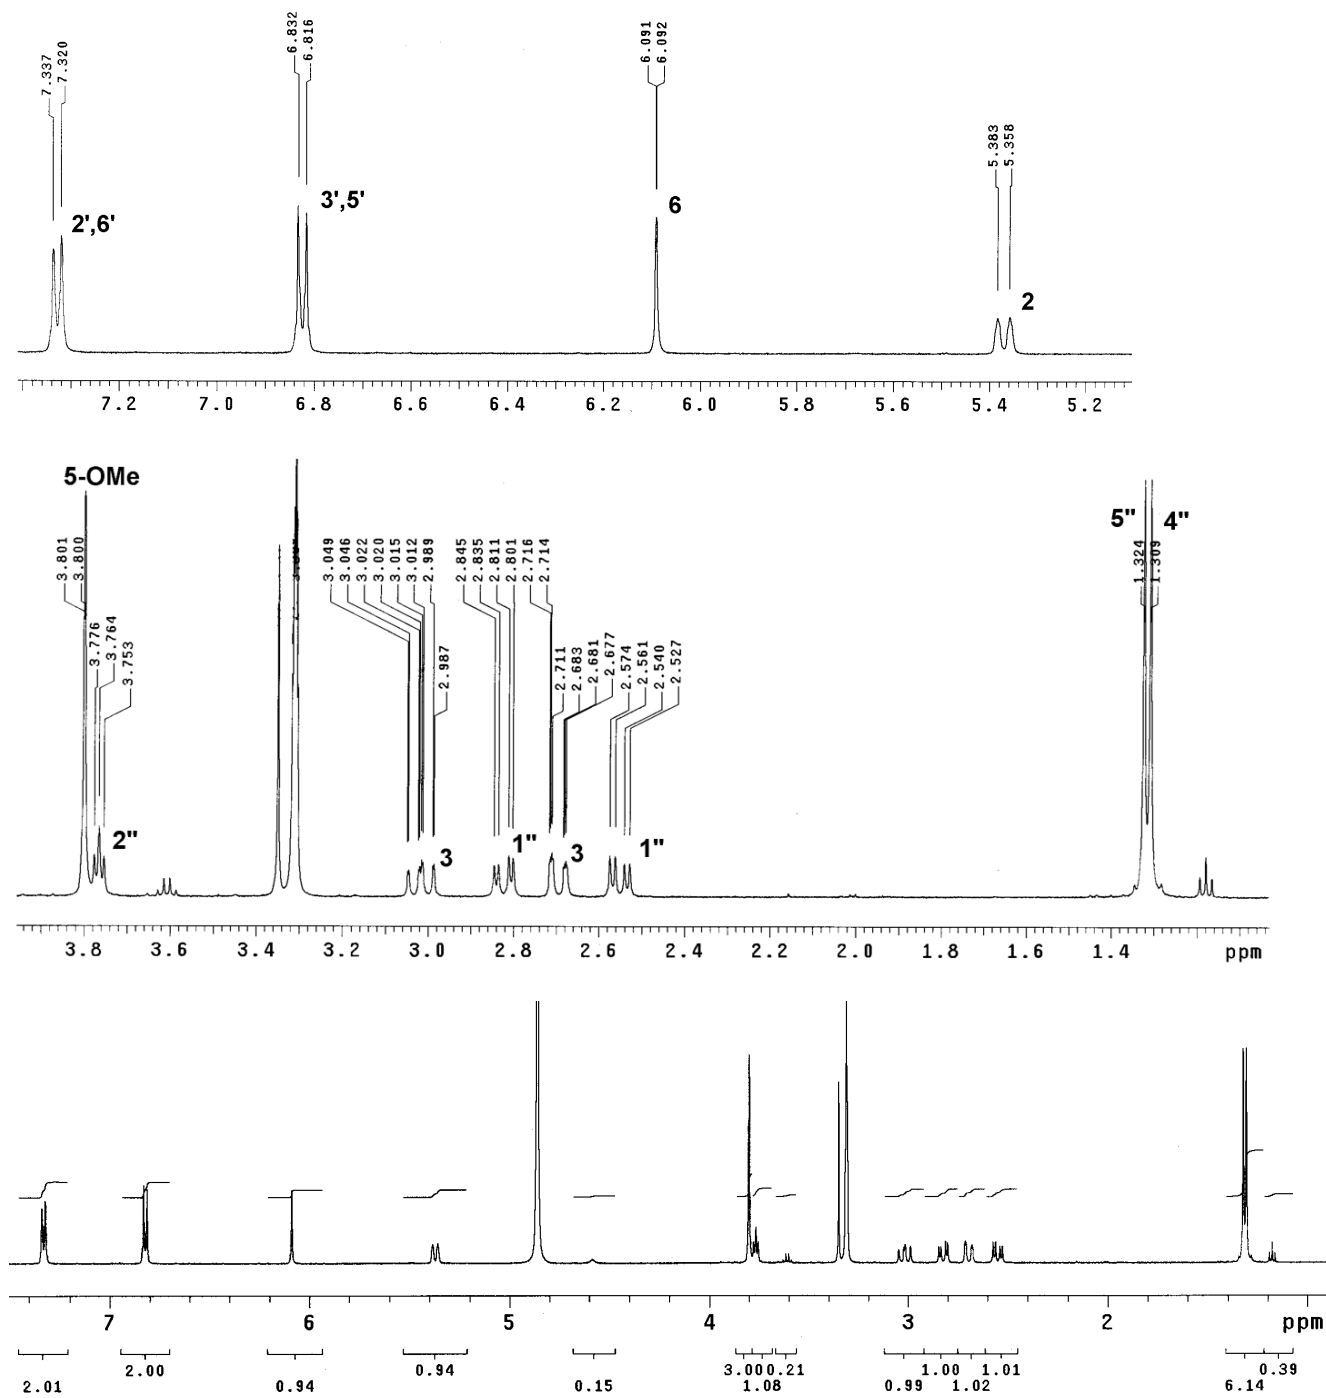

Figure S4.  $^{13}\text{C}$  NMR spectrum of **2**

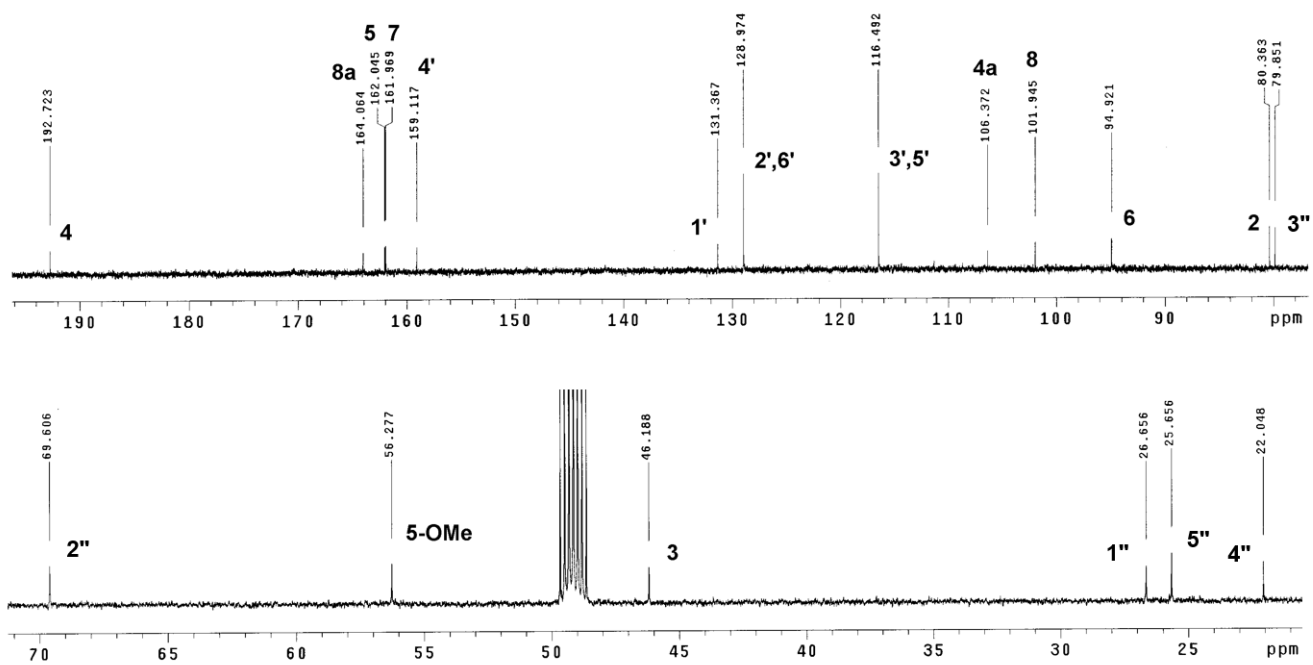

Figure S5. <sup>1</sup>H NMR spectrum of the new compound 3

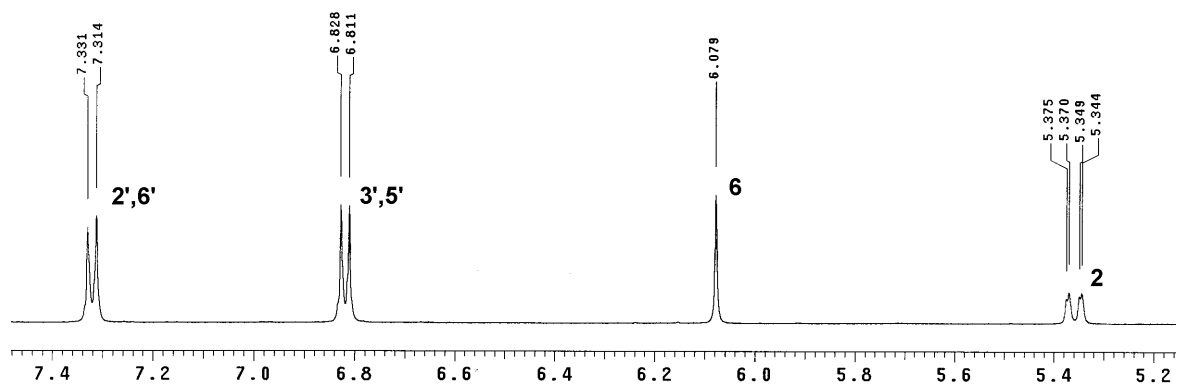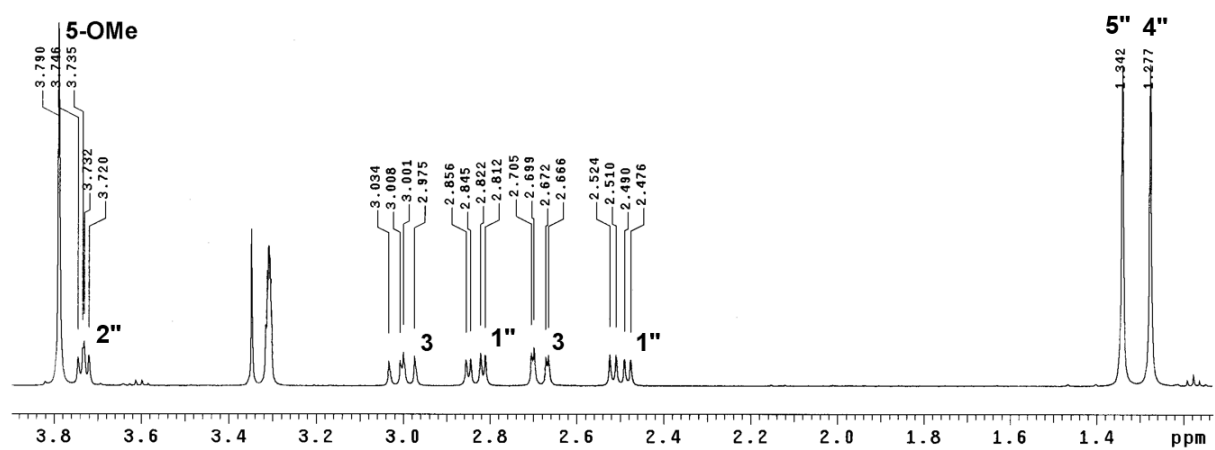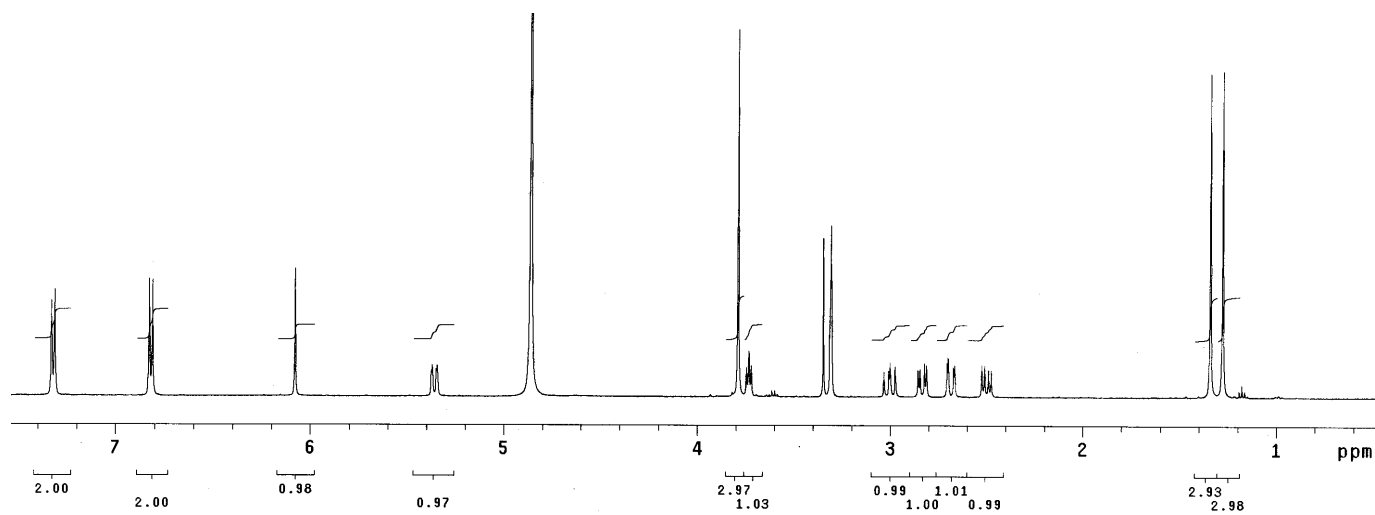

**Figure S6.**  $^{13}\text{C}$  NMR spectrum of the new compound **3**

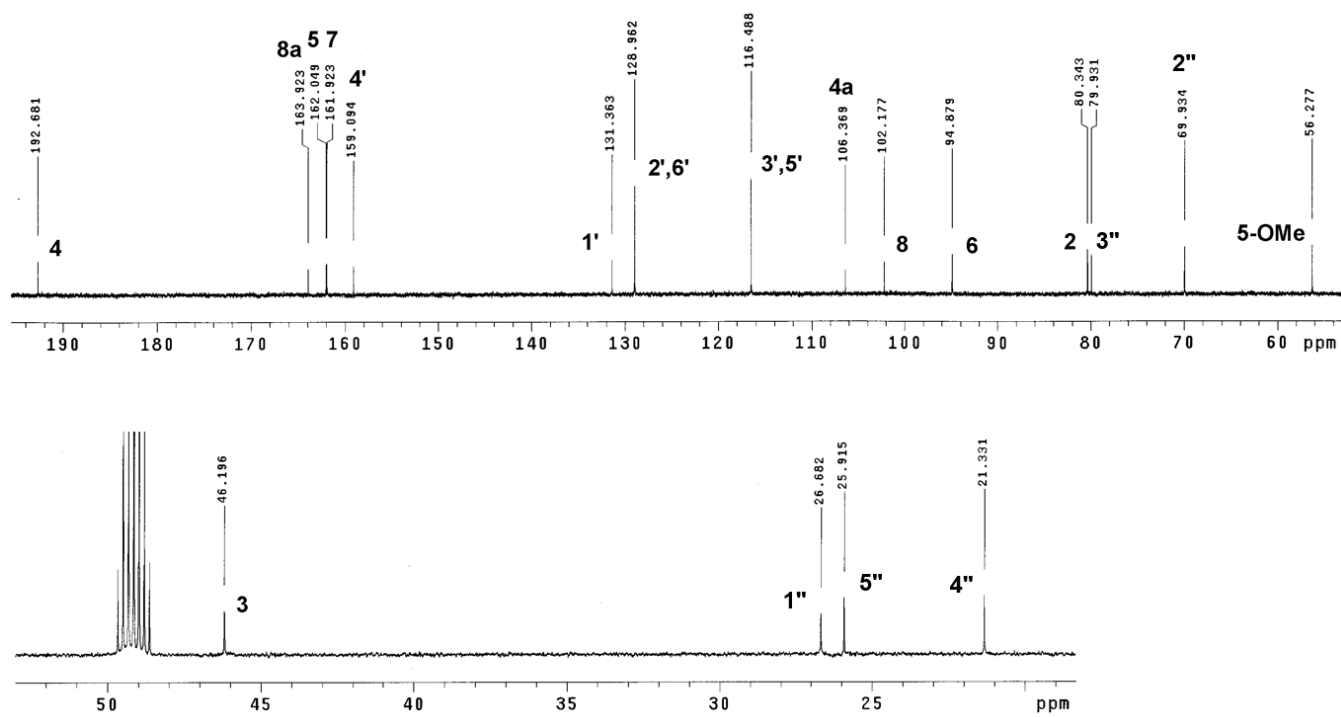

Figure S7. HSQC NMR spectrum of a mixture of **2** and **3**

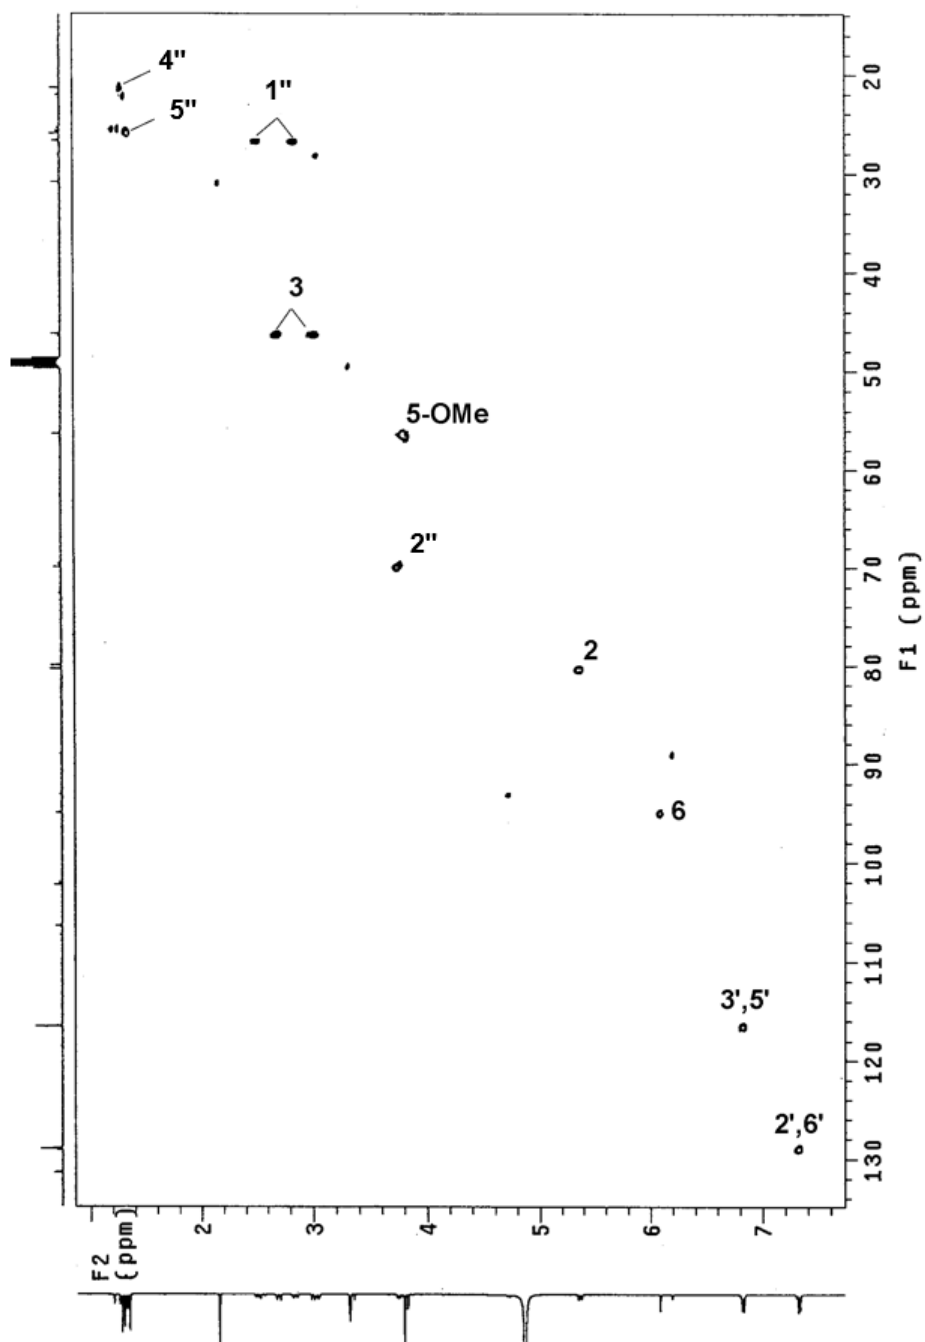



Figure S8. HMBC NMR Spectrum of a mixture of 2 and 3

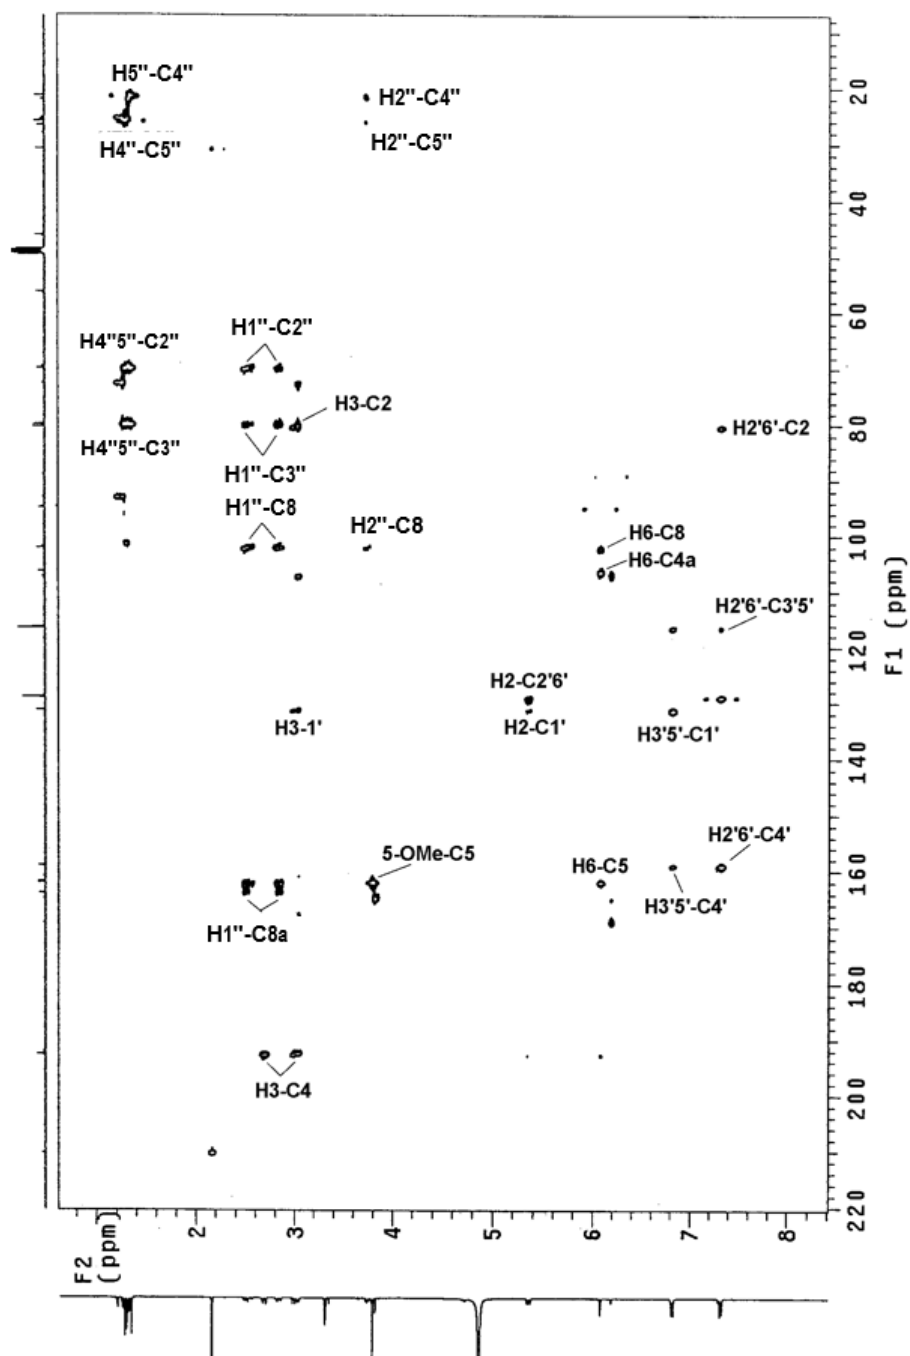

Figure S9. <sup>1</sup>H NMR spectrum of the new compound 4

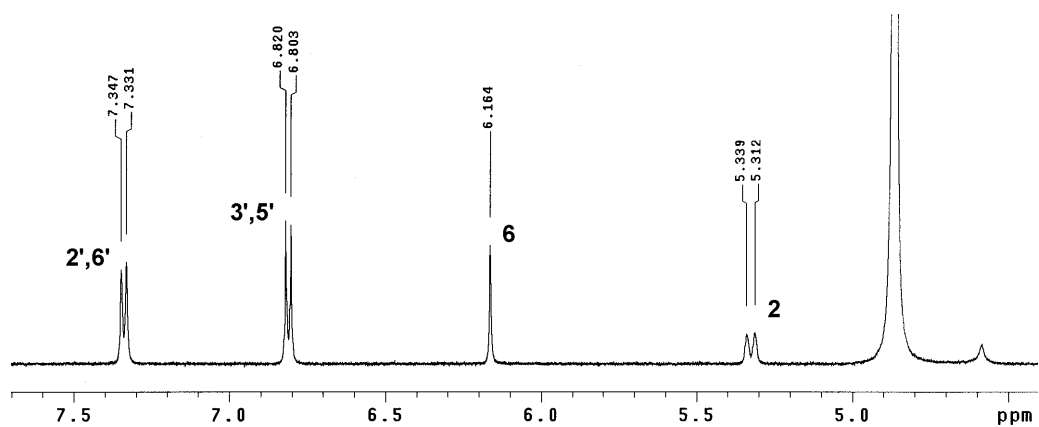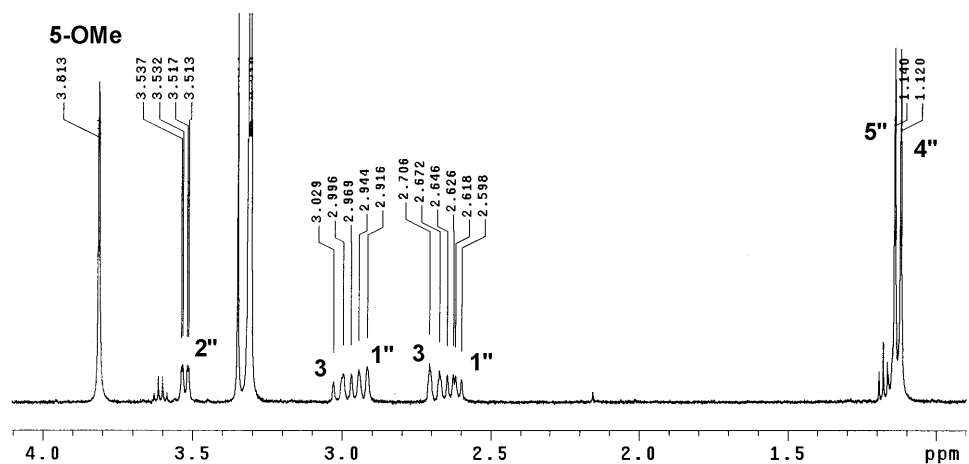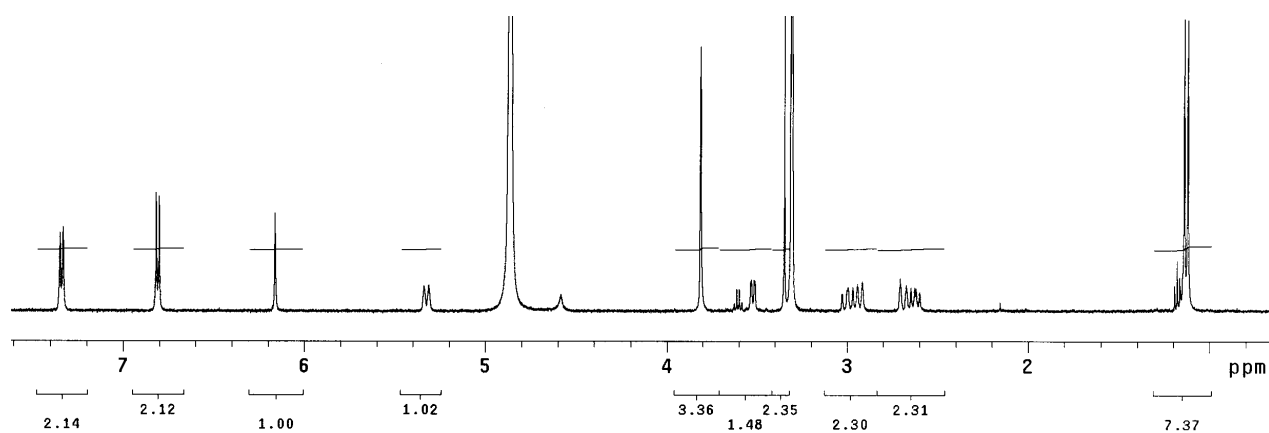

**Figure S10.**  $^{13}\text{C}$  NMR spectrum of the new compound **4**

\* C-7 carbon signal was identified from HMBC NMR spectrum.

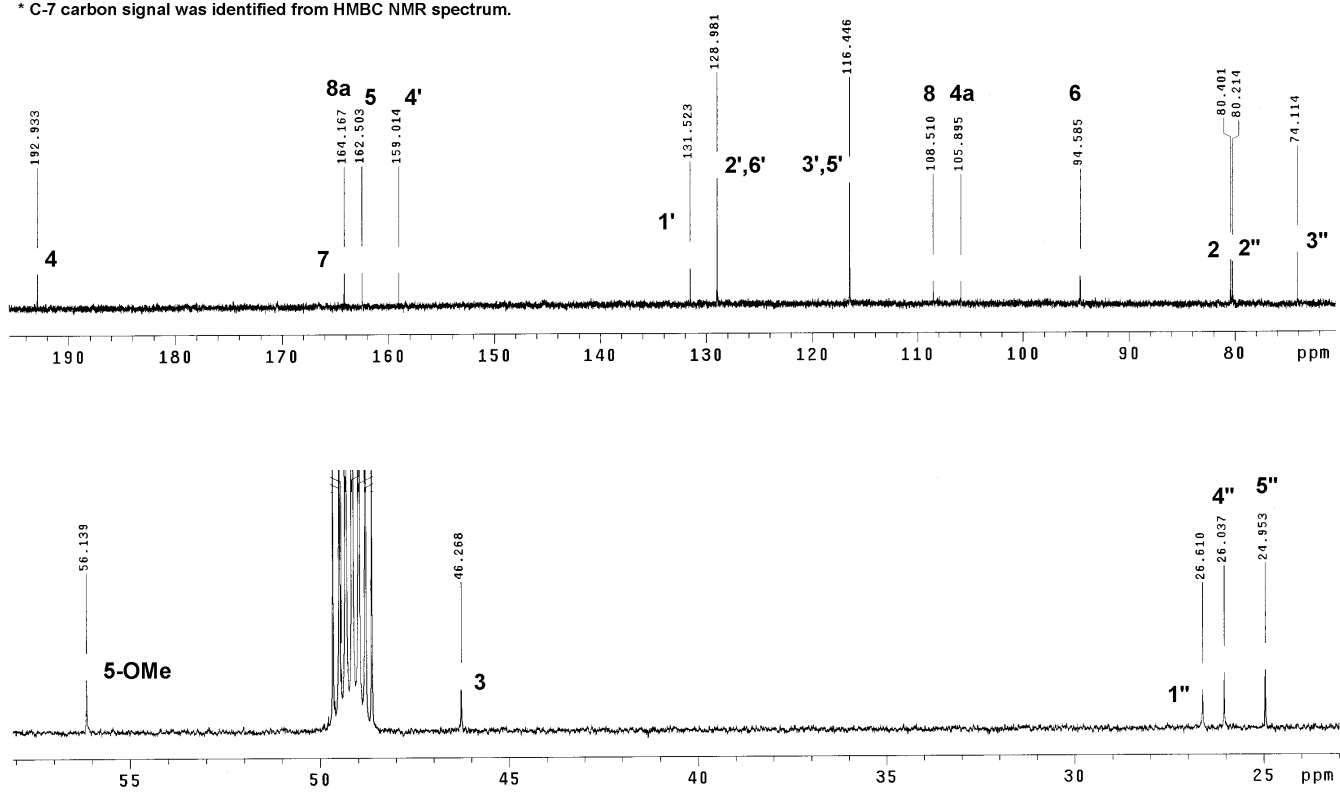

Figure S11. <sup>1</sup>H NMR spectrum of the new compound 5

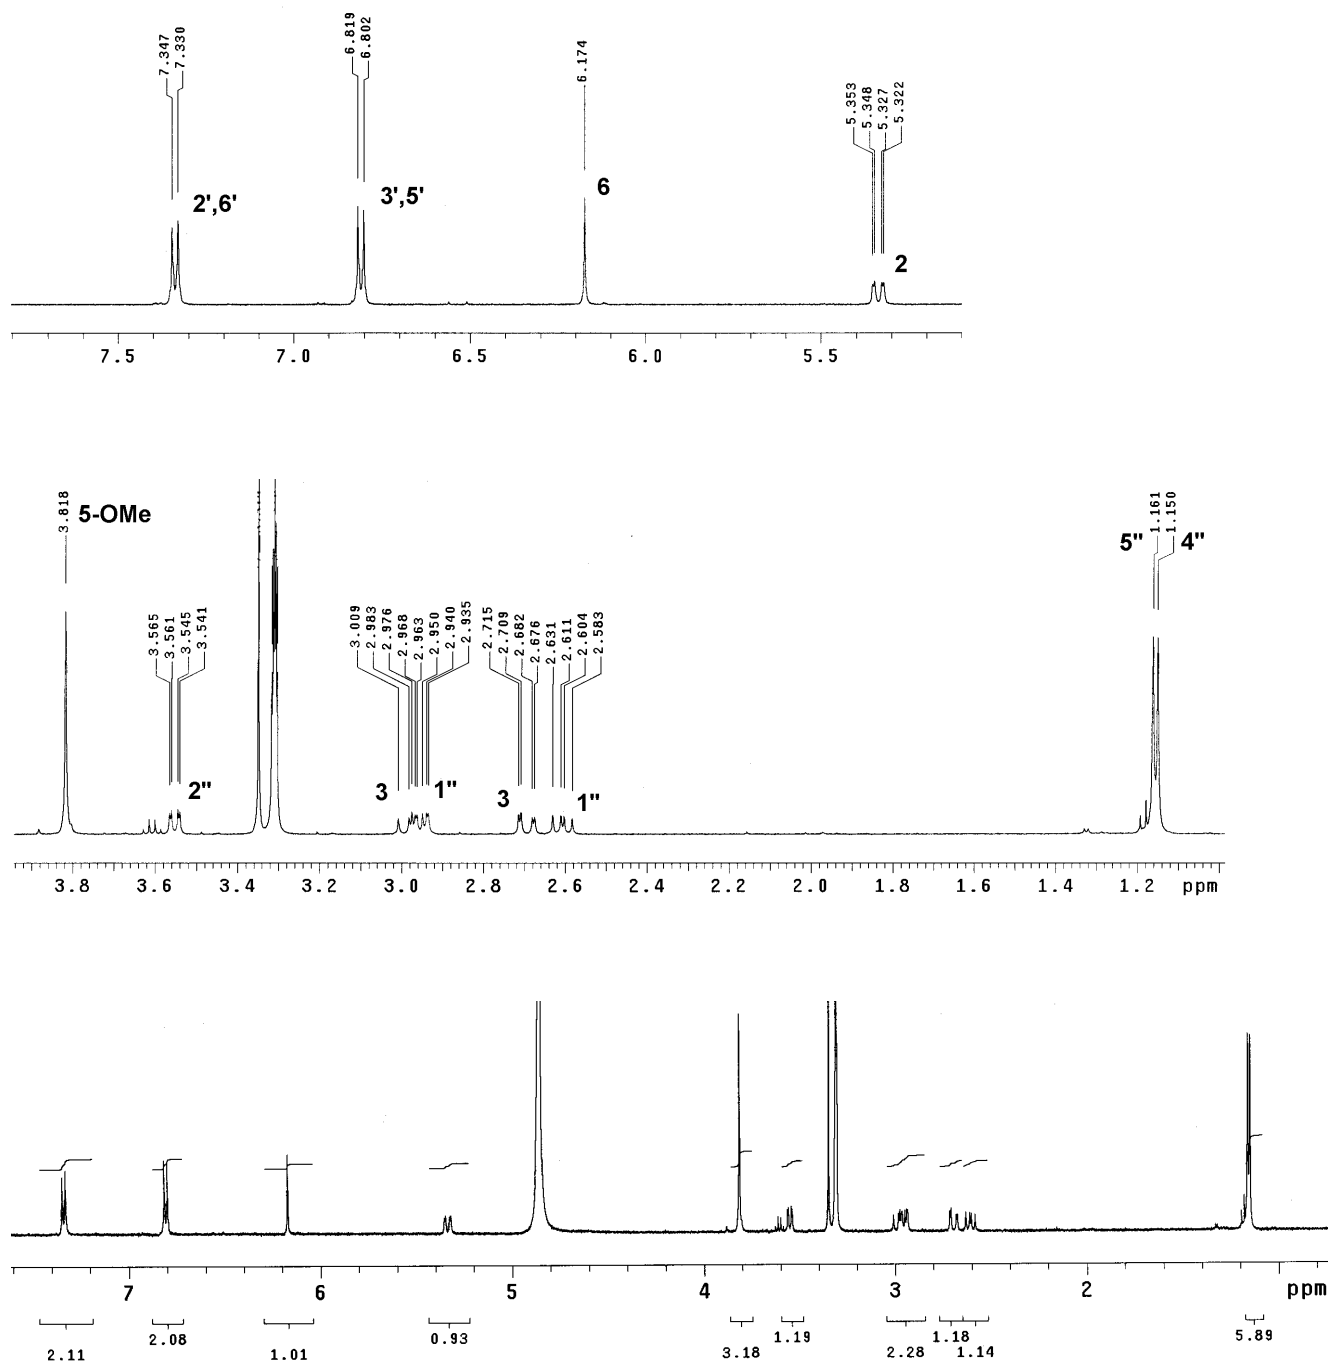

**Figure S12.**  $^{13}\text{C}$  NMR spectrum of the new compound **5**

\* C-7 carbon signal was identified from HMBC NMR spectrum.

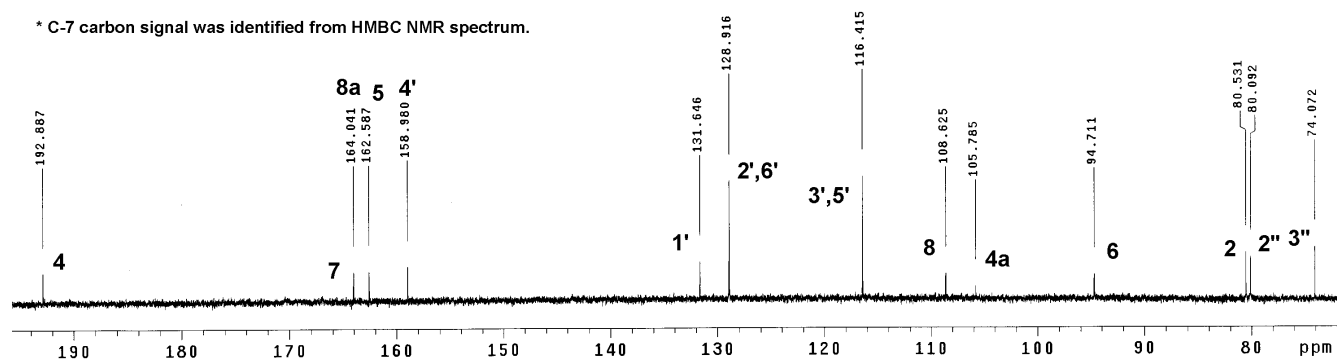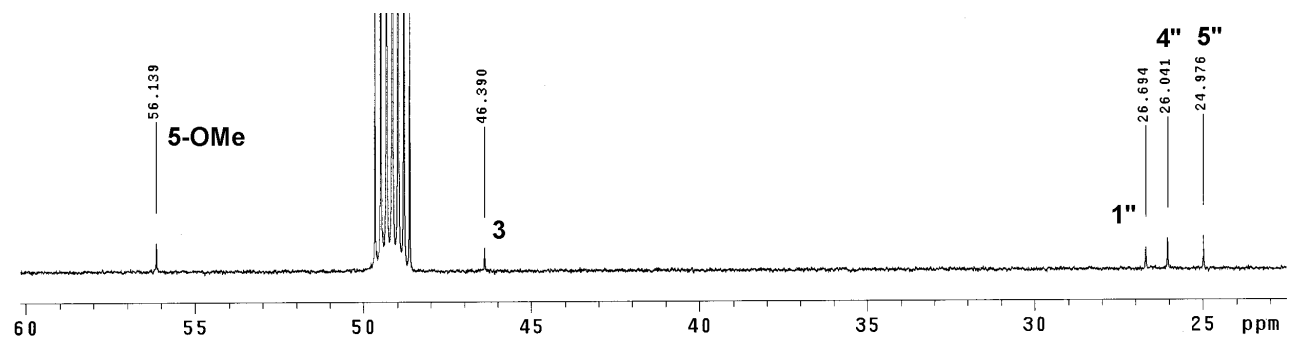

Figure S13. HSQC NMR spectrum of a mixture of 4 and 5

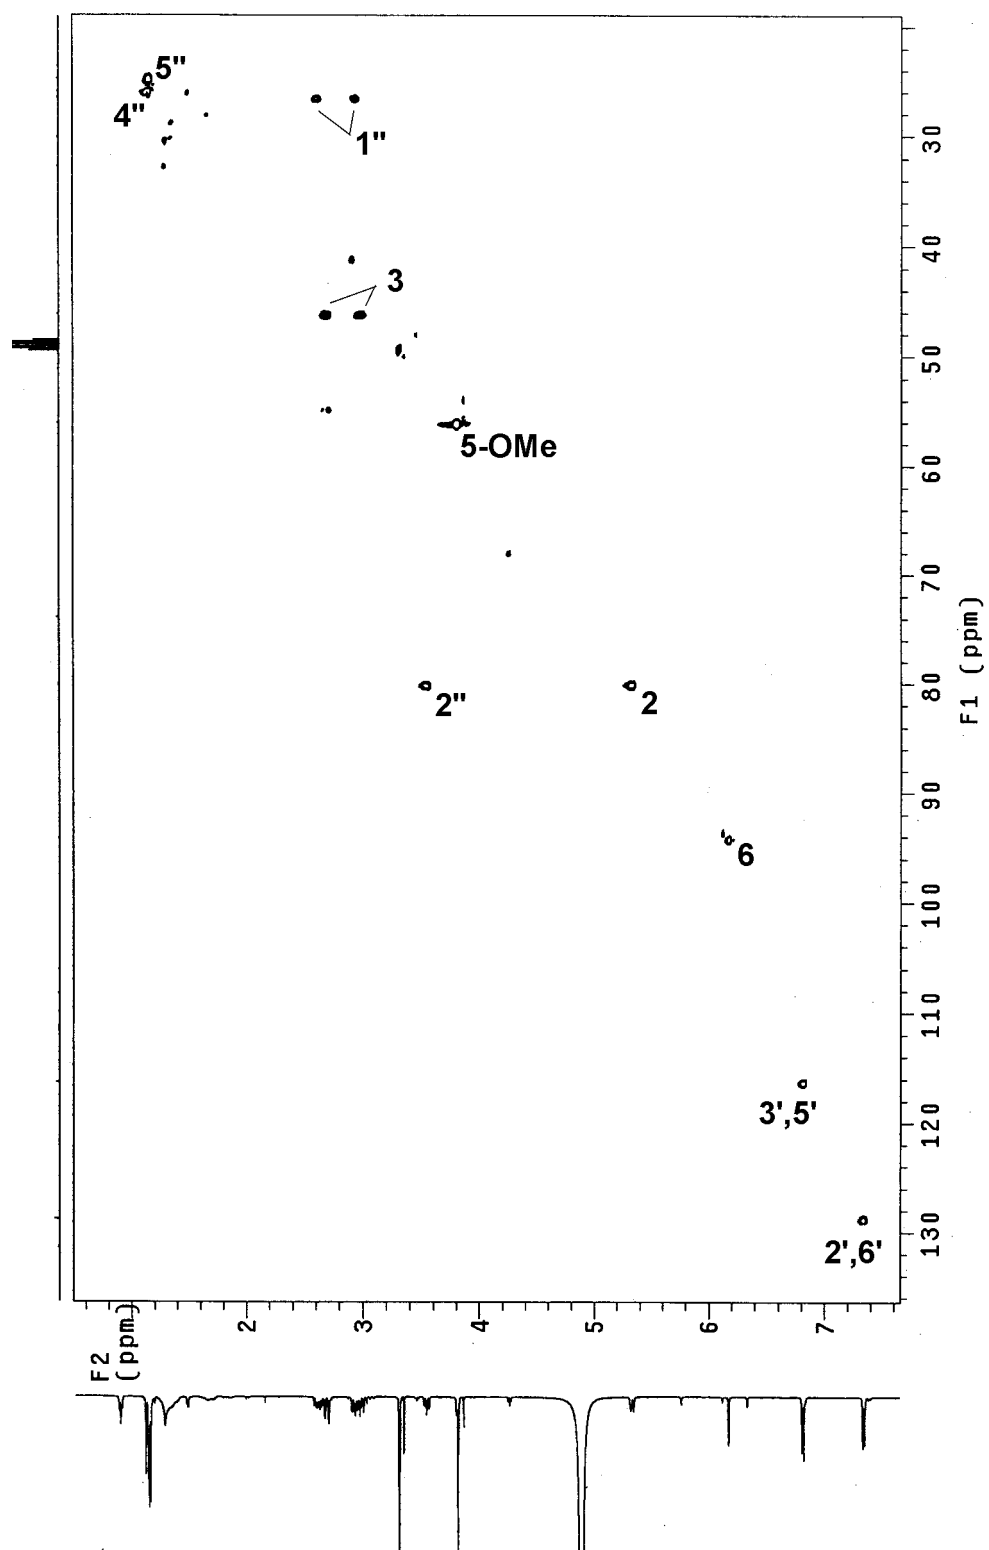

Figure S14. HMBC NMR spectrum of a mixture 4 and 5

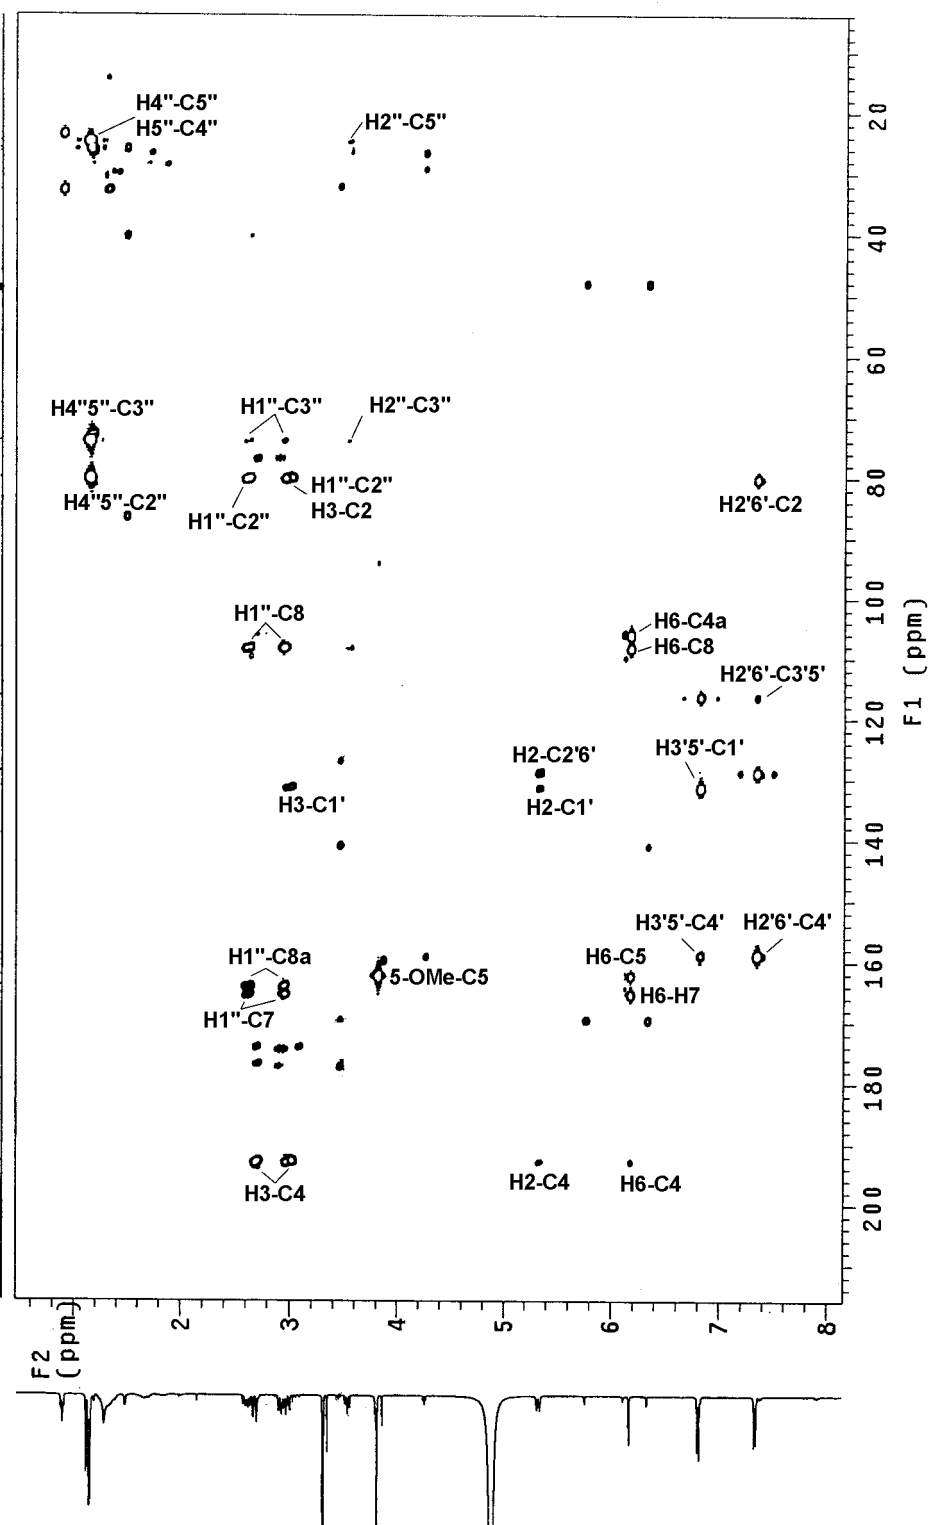

Figure S15. <sup>1</sup>H NMR spectrum of 6

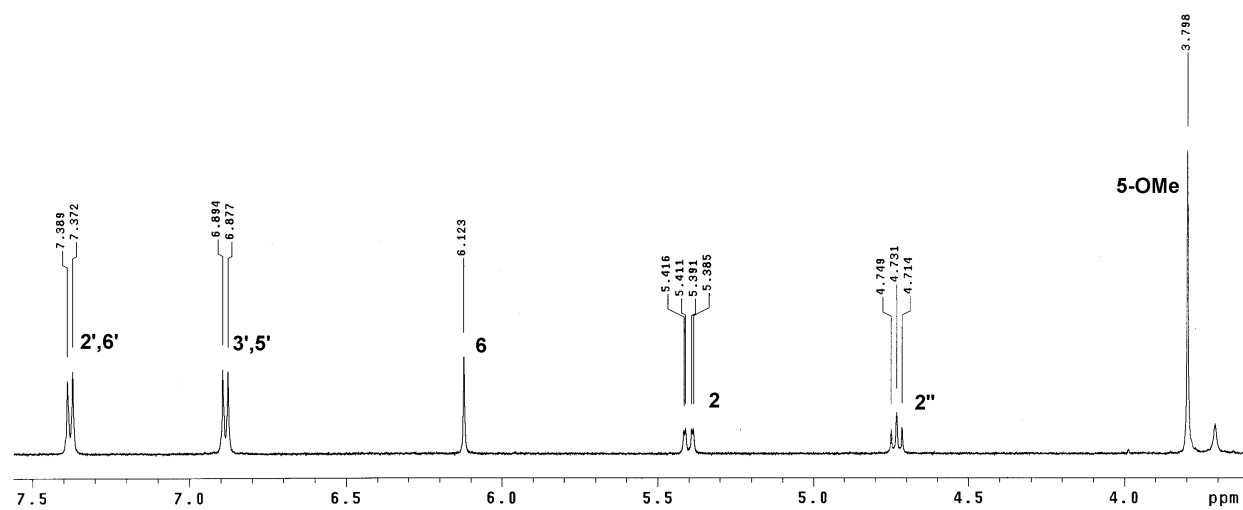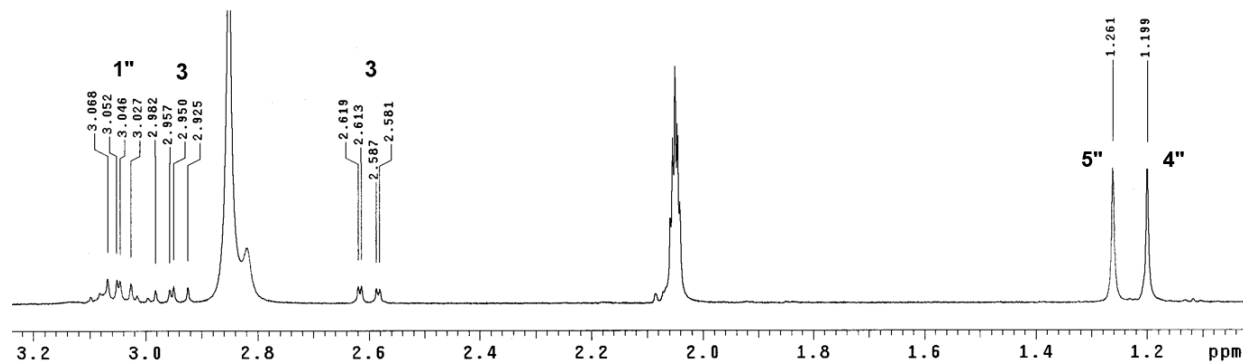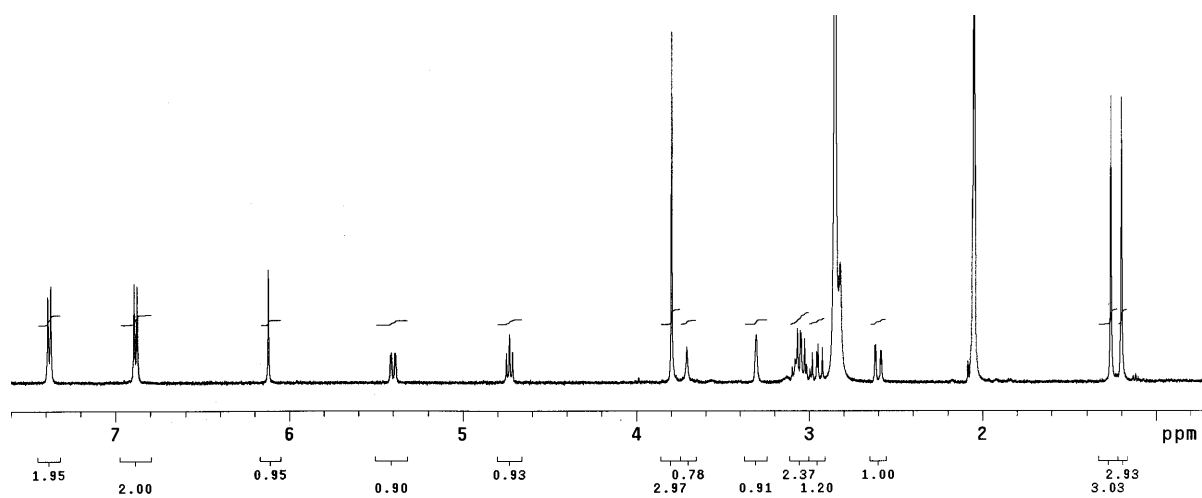



Figure S16.  $^{13}\text{C}$  NMR spectrum of **6**

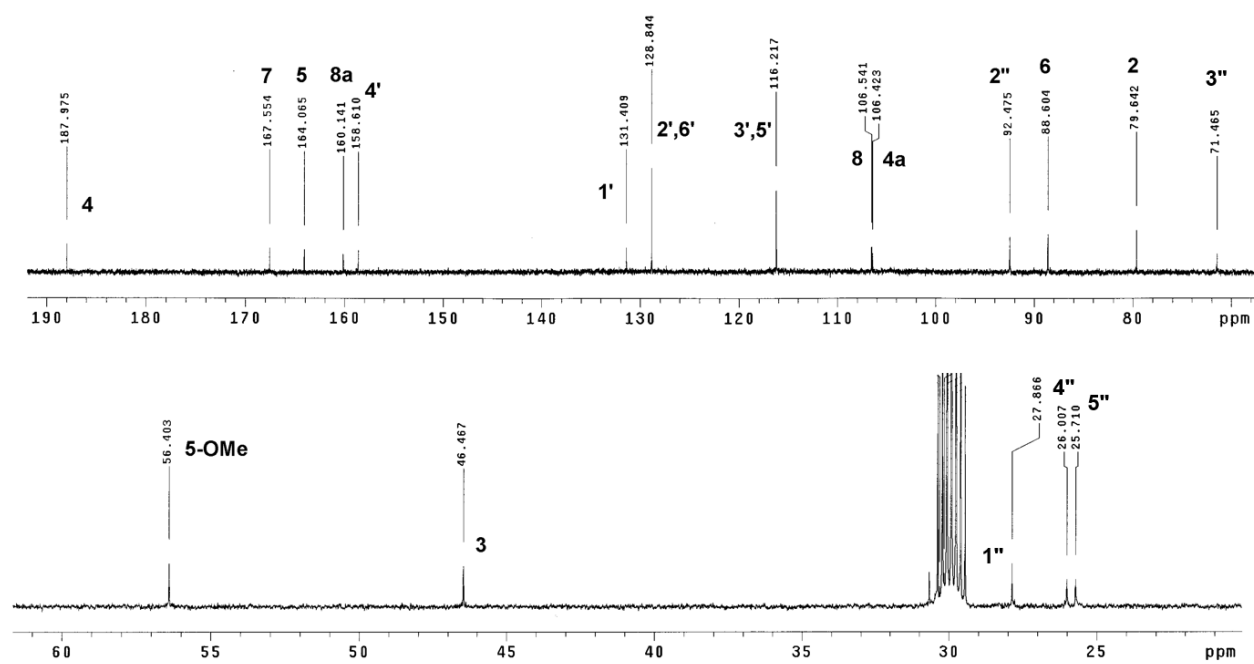

Figure S17. <sup>1</sup>H NMR spectrum of 7

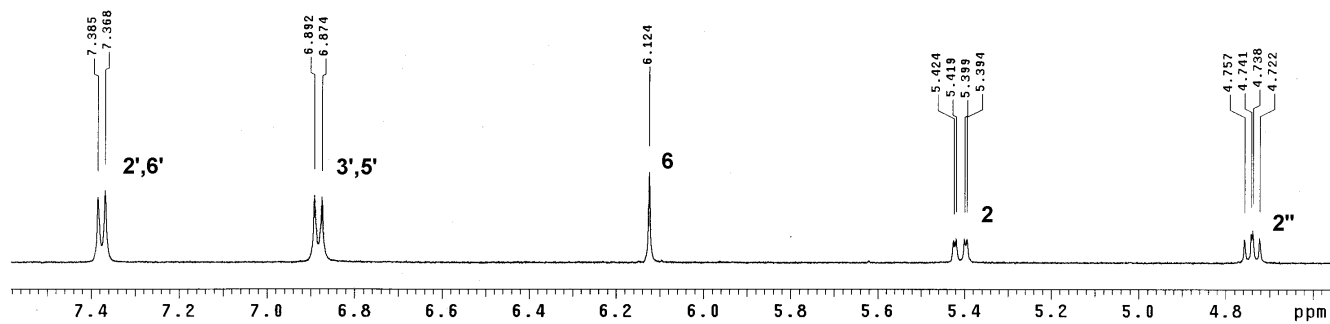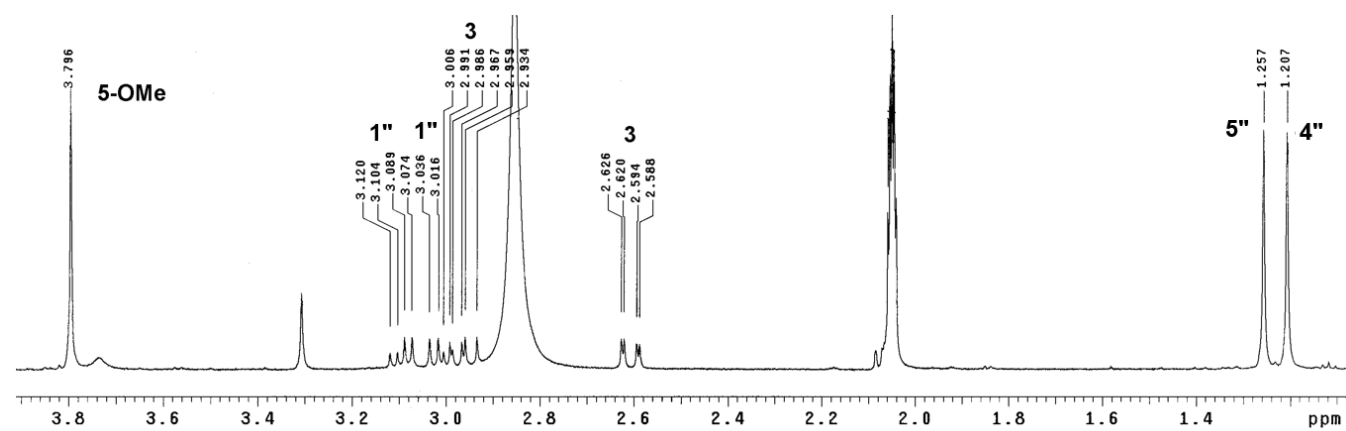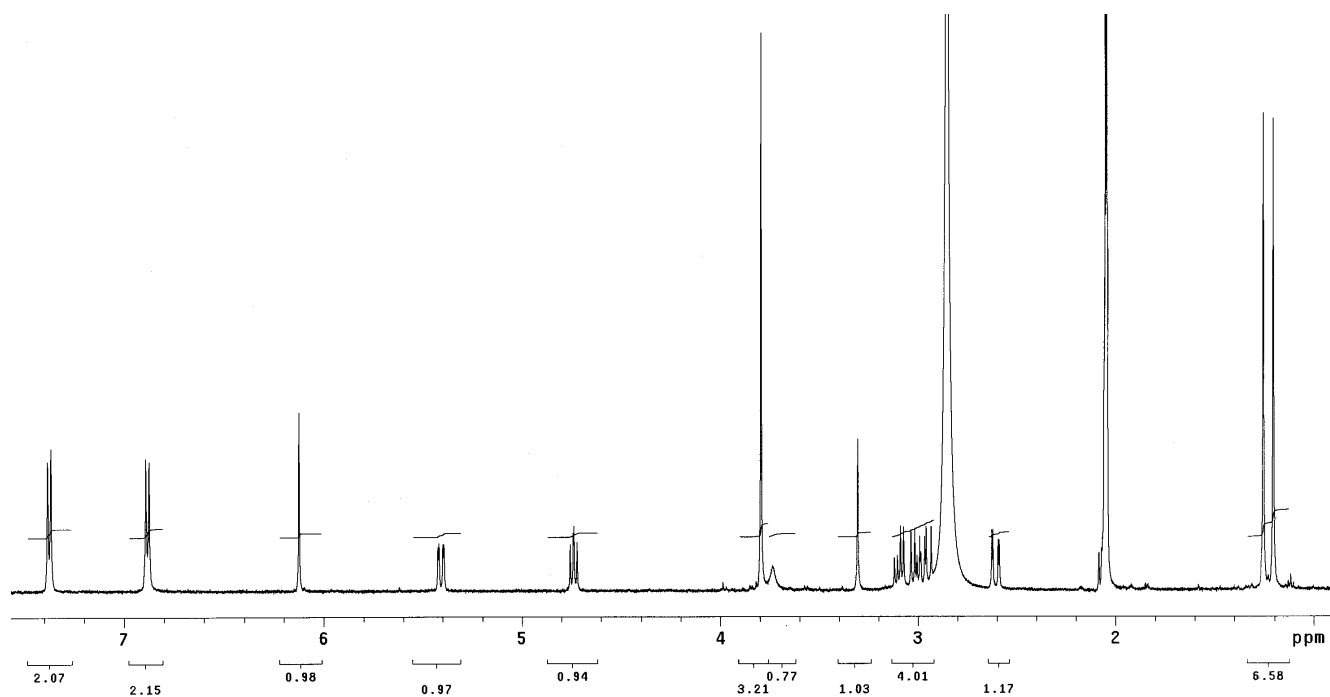

Figure S18.  $^{13}\text{C}$  NMR spectrum of 7

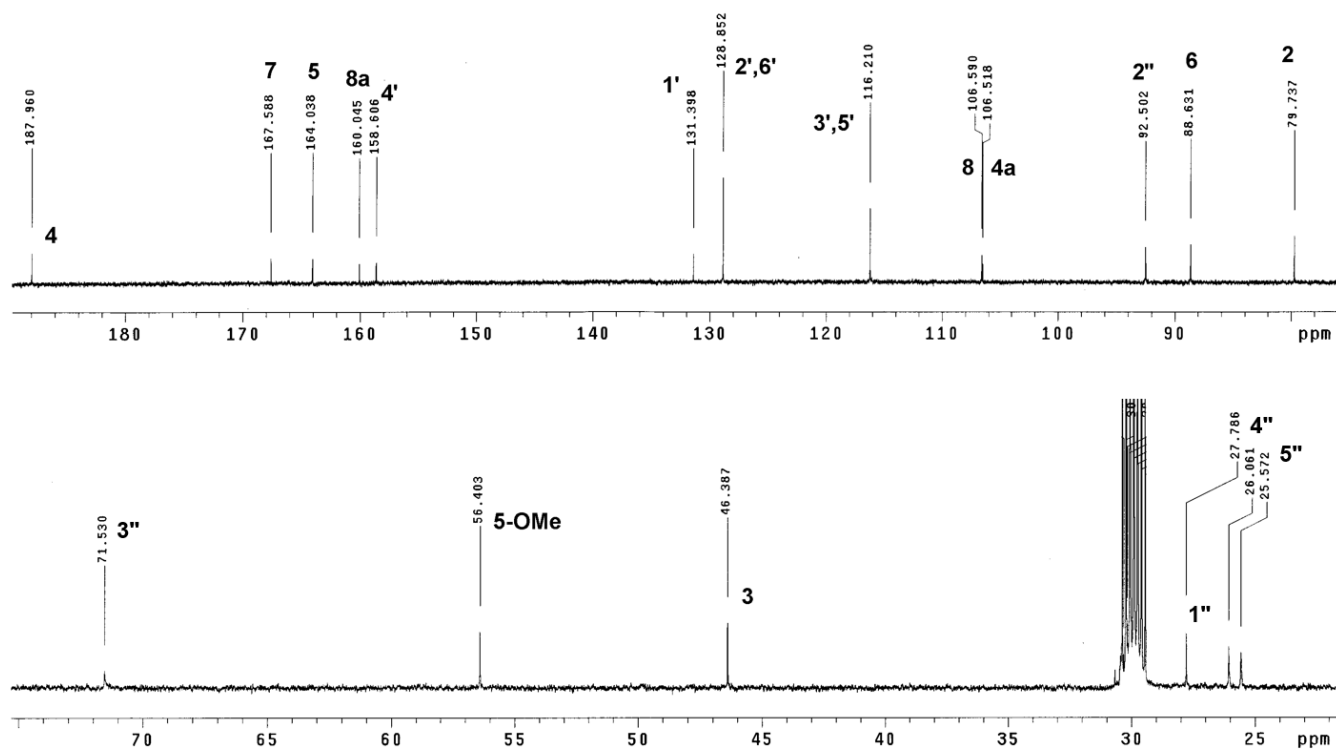

Figure S19. High resolution ESIMS data of metabolites 2-7

a) Metabolite 2

1: TOF MS ES+  
5.54e+002

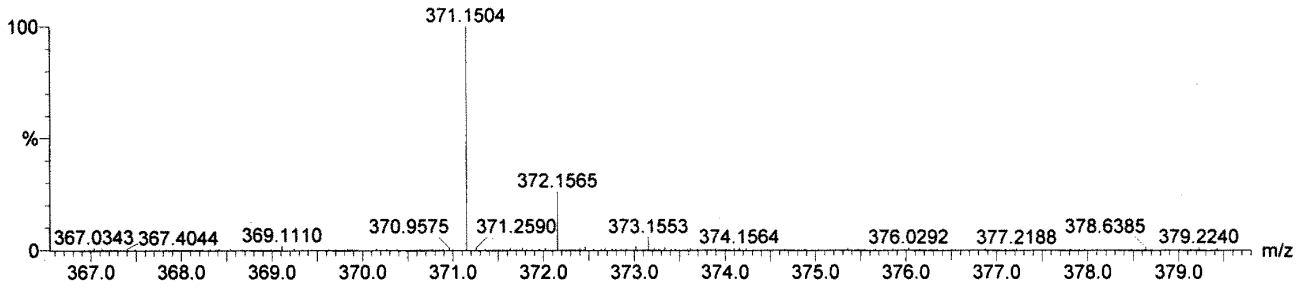

|          |            |     |      |      |       |              |            |  |
|----------|------------|-----|------|------|-------|--------------|------------|--|
| Minimum: |            |     |      |      |       |              |            |  |
| Maximum: |            | 3.0 | 10.0 | 50.0 |       |              |            |  |
| Mass     | Calc. Mass | mDa | PPM  | DBE  | i-FIT | i-FIT (Norm) | Formula    |  |
| 371.1504 | 371.1495   | 0.9 | 2.4  | 10.5 | 92.8  | 0.0          | C21 H23 O6 |  |

b) Metabolite 3

1: TOF MS ES+  
3.64e+004

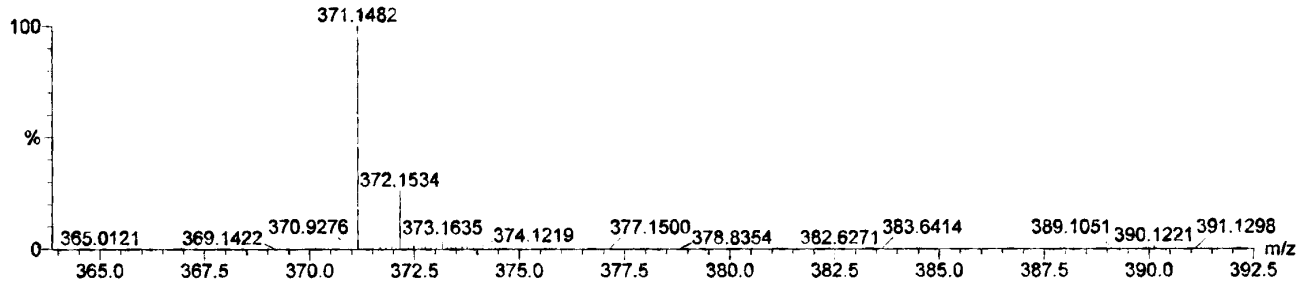

|          |            |      |      |      |       |              |            |  |
|----------|------------|------|------|------|-------|--------------|------------|--|
| Minimum: |            |      |      |      |       |              |            |  |
| Maximum: |            | 3.0  | 10.0 | 50.0 |       |              |            |  |
| Mass     | Calc. Mass | mDa  | PPM  | DBE  | i-FIT | i-FIT (Norm) | Formula    |  |
| 371.1482 | 371.1495   | -1.3 | -3.5 | 10.5 | 195.2 | 0.0          | C21 H23 O6 |  |

c) Metabolite 4

1: TOF MS ES+  
4.00e+004

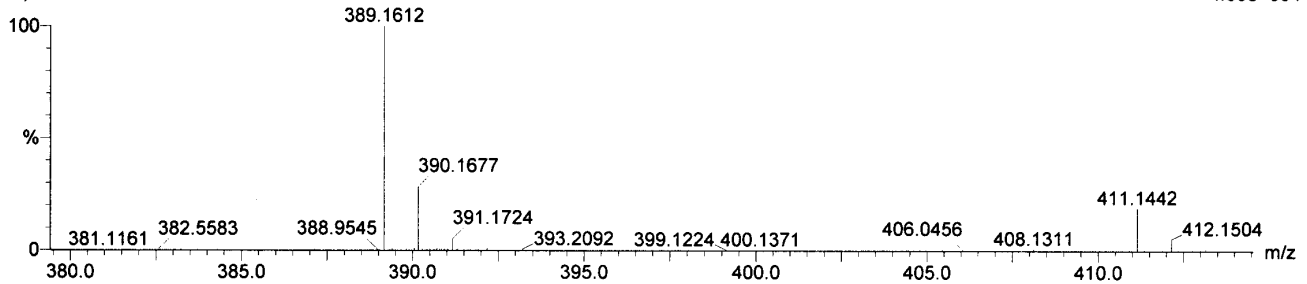

|          |            |     |      |      |       |              |            |  |
|----------|------------|-----|------|------|-------|--------------|------------|--|
| Minimum: |            |     |      |      |       |              |            |  |
| Maximum: |            | 3.0 | 10.0 | 50.0 |       |              |            |  |
| Mass     | Calc. Mass | mDa | PPM  | DBE  | i-FIT | i-FIT (Norm) | Formula    |  |
| 389.1612 | 389.1600   | 1.2 | 3.1  | 9.5  | 341.7 | 0.0          | C21 H25 O7 |  |

d) Metabolite 5

1: TOF MS ES+  
3.23e+004

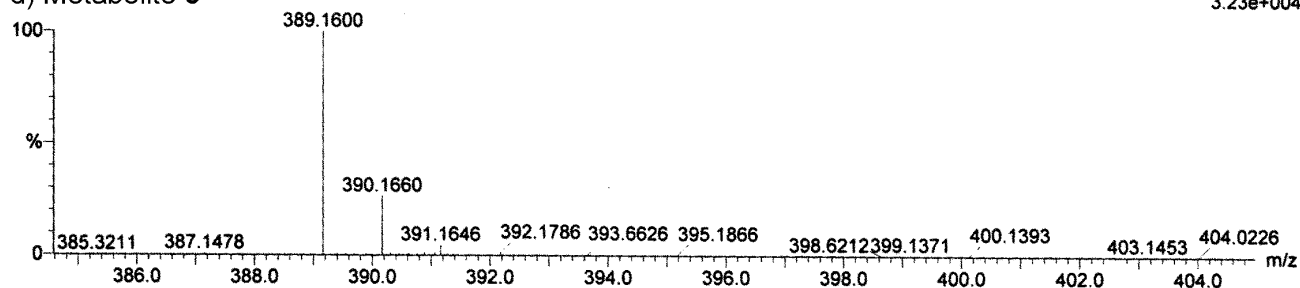

Minimum: -1.5  
Maximum: 3.0 10.0 50.0

| Mass     | Calc. Mass | mDa | PPM | DBE | i-FIT | i-FIT (Norm) | Formula    |
|----------|------------|-----|-----|-----|-------|--------------|------------|
| 389.1600 | 389.1600   | 0.0 | 0.0 | 9.5 | 247.2 | 0.0          | C21 H25 O7 |

e) Metabolite 6

1: TOF MS ES+  
3.44e+004

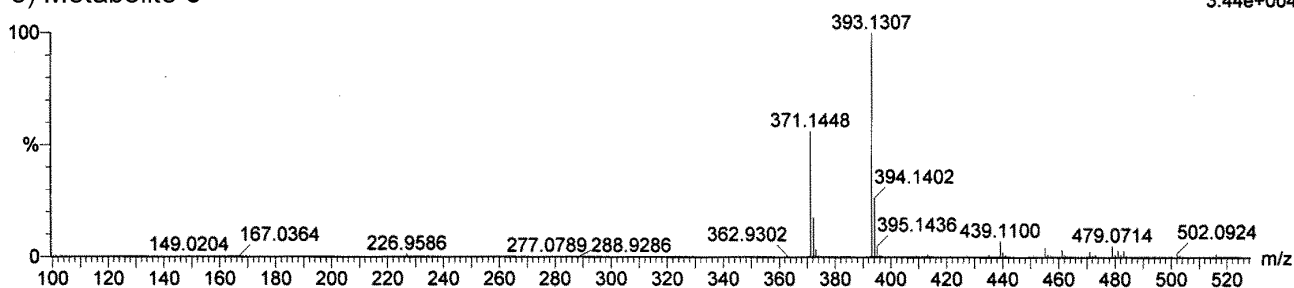

Minimum: -1.5  
Maximum: 5.0 10.0 50.0

| Mass     | Calc. Mass | mDa  | PPM  | DBE  | i-FIT | i-FIT (Norm) | Formula       |
|----------|------------|------|------|------|-------|--------------|---------------|
| 393.1307 | 393.1314   | -0.7 | -1.8 | 10.5 | 344.2 | 0.0          | C21 H22 O6 Na |

f) Metabolite 7

1: TOF MS ES+  
4.02e+003

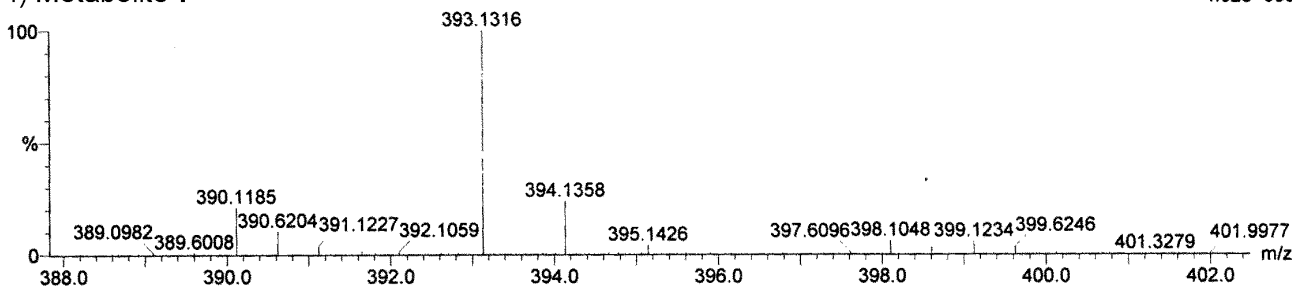

Minimum: -1.5  
Maximum: 10.0 10.0 50.0

| Mass     | Calc. Mass | mDa | PPM | DBE  | i-FIT | i-FIT (Norm) | Formula       |
|----------|------------|-----|-----|------|-------|--------------|---------------|
| 393.1316 | 393.1314   | 0.2 | 0.5 | 10.5 | 195.6 | 0.0          | C21 H22 O6 Na |

**Figure S20.** Circular dichroism (CD) profiles of metabolites **2–7**

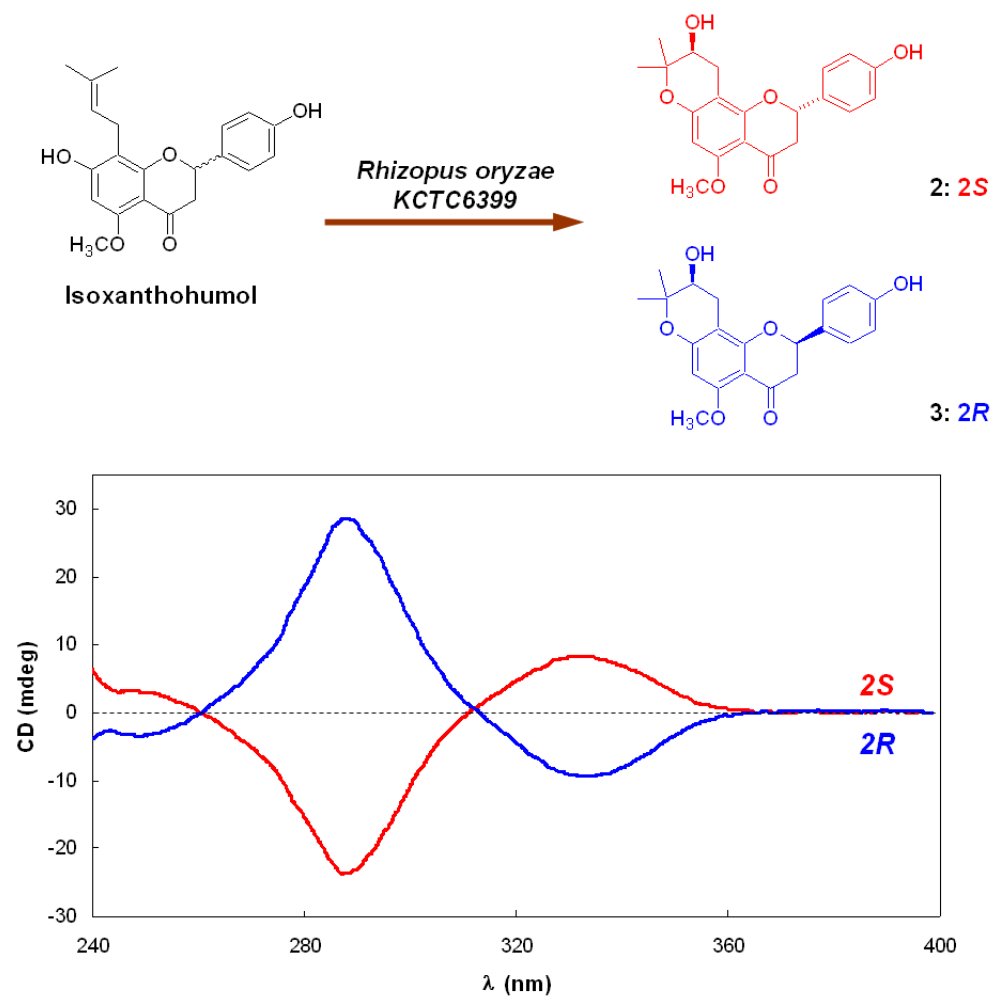

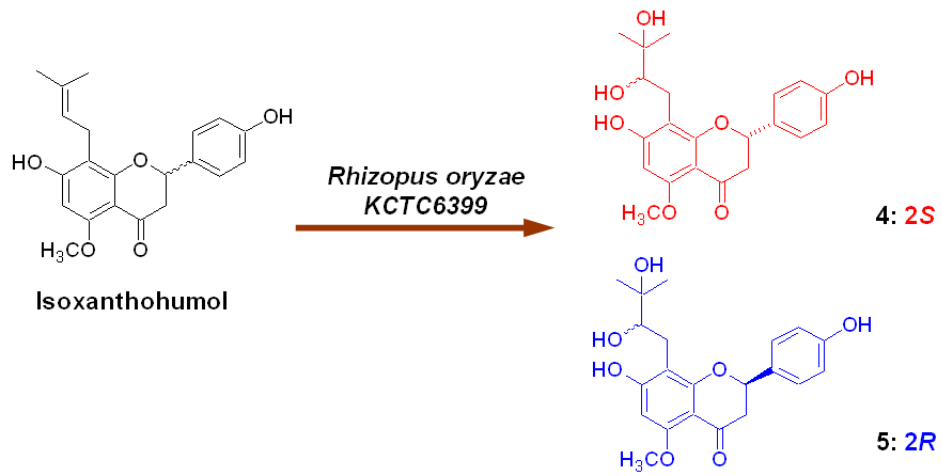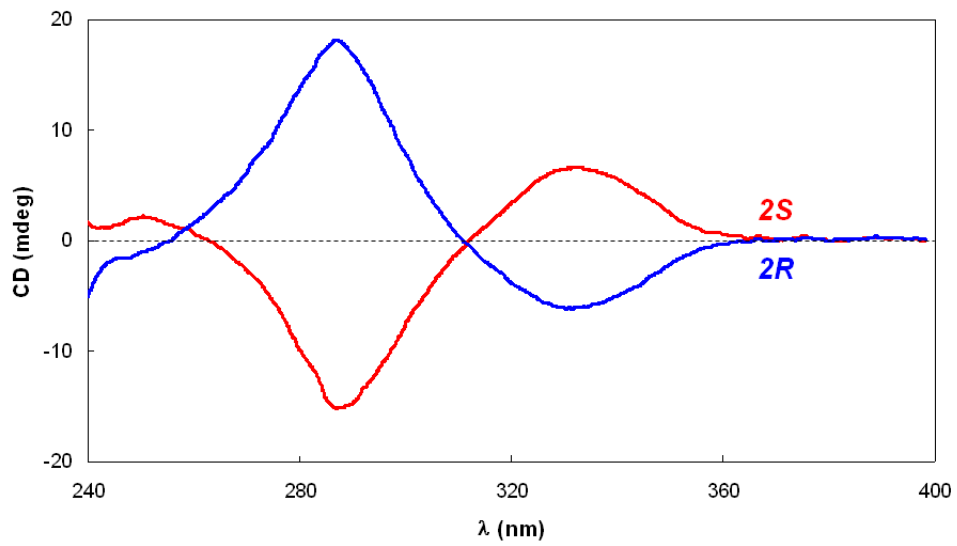

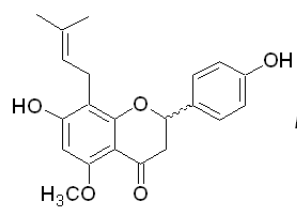

Isoxanthohumol

*Fusarium oxysporum* f. sp. *lini*  
KCTC16325

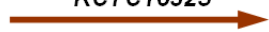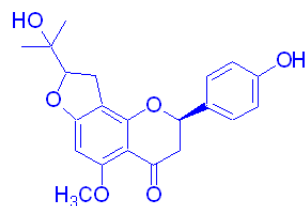

6: **2R**

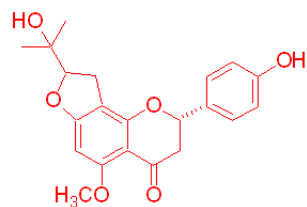

7: **2S**

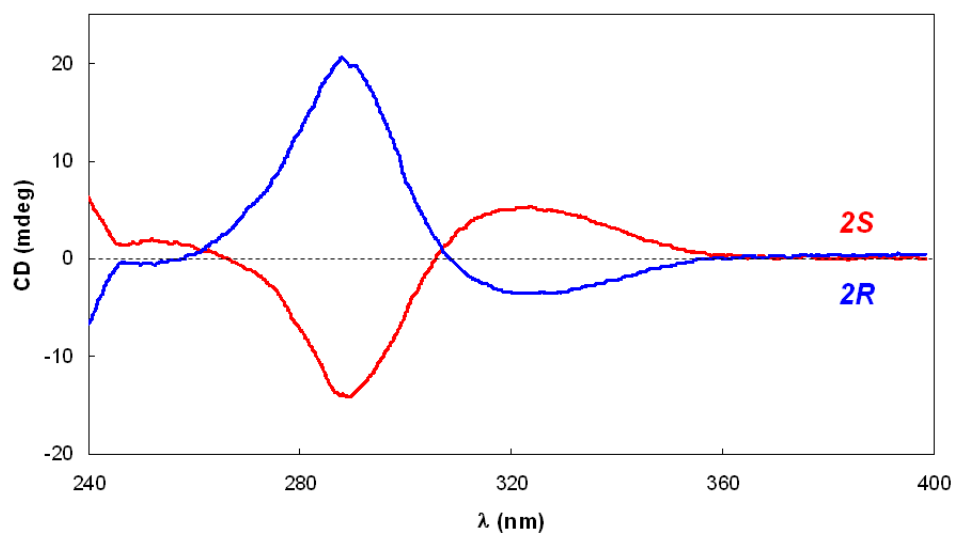

Supplement: molecules-24-00394-s001.pdf [file molecules-24-00394-s001.pdf]
